# Supplementary material for: Fabrication of molecularly-imprinted gold nanoparticle-embedded Fe-MOFs for highly selective SERS detection of 17β-estradiol in milk
Source: Royal Society of Chemistry journal article supplement (doi:10.1039/d3an00343d), 2023-01-01
Supplement: d3an00343d1.pdf [file d3an00343d1.pdf]

## Supporting Information

### **Fabrication of molecularly imprinted gold nanoparticles- embedded Fe-MOFs for highly selective SERS detection of 17 $\beta$ -estradiol in milk**

**Mengmeng Zhang, Zhouya Wu, Yunhan Yang, Jing Ye, Sheng Han\*, Yuanting Li\***

School of Chemical and Environmental Engineering, Shanghai Institute of Technology,  
Shanghai 201418, China

\*Corresponding author:

Yuan-Ting Li; Sheng Han

School of Chemical and Environmental Engineering

Shanghai Institute of Technology

No. 100 Haiquan Road

Shanghai, 201418, P. R. China

Tel/Fax: + 086 21 60873241

E-mail: [liyuanting@sit.edu.cn](mailto:liyuanting@sit.edu.cn) (Y.T. Li); [hansheng654321@sina.com](mailto:hansheng654321@sina.com) (S. Han)

### **Contents:**

**Figure S1-Figure S14 (Page S1-Page S7)**

**Table S1 (Page S7)**

**Text S1 (Page S8-Page S9)**

**References (Page S9)**

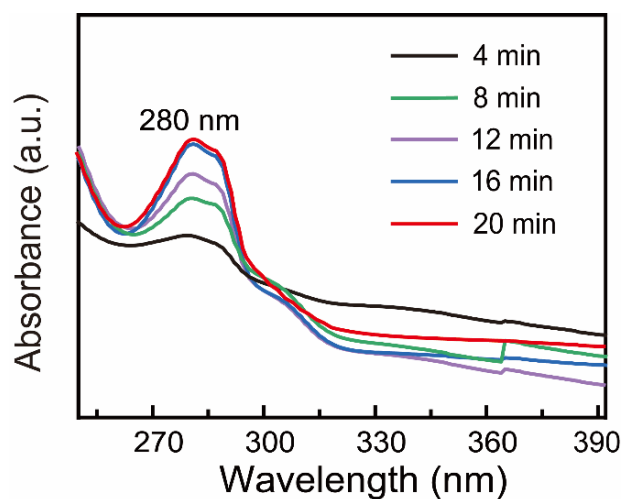

**Figure S1.** UV-vis spectroscopy of the elution solution. The wavelength of 17β-E2 is located at 280 nm.

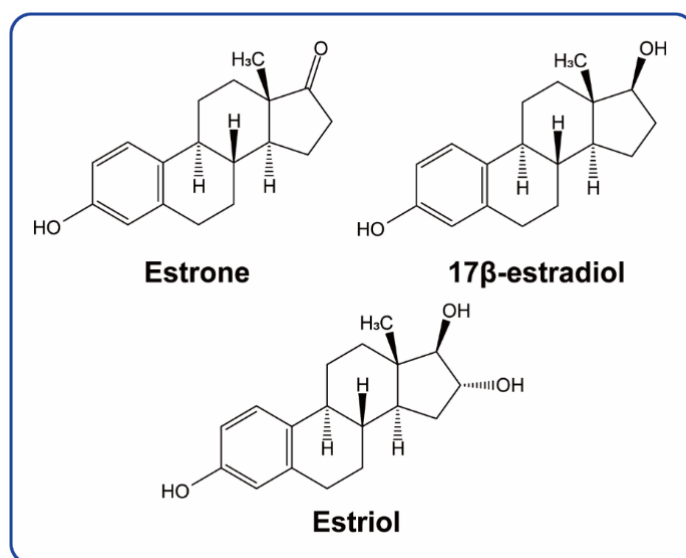

**Figure S2.** The chemical structure of estrone (E1), 17β-estradiol (17β-E2) and estriol (E3).

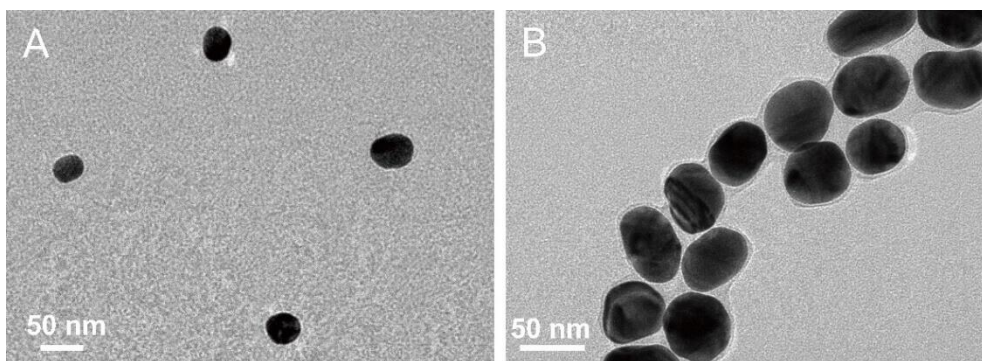

**Figure S3.** TEM images of (A) AuNPs and (B) core-shell AuNP@MIP-PDA.

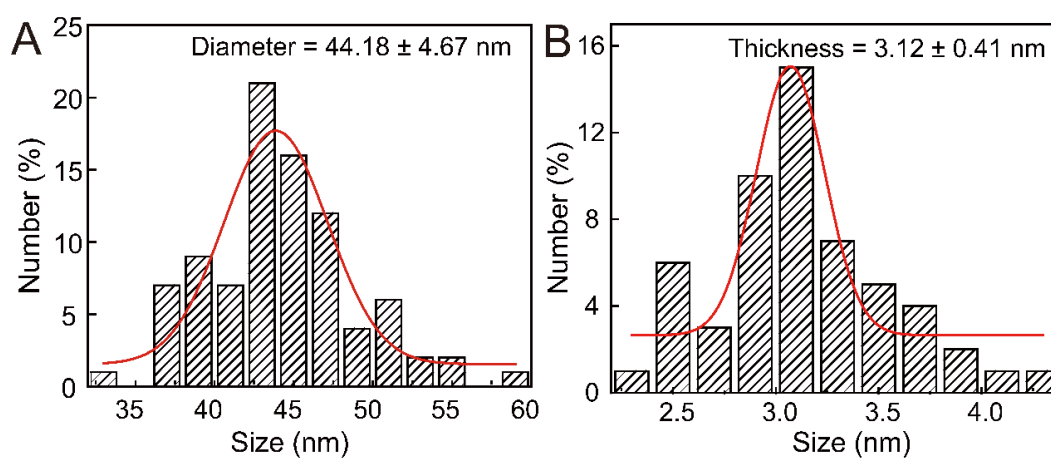

**Figure S4.** The size distribution of citrate-stabilized AuNPs (A) and the thickness of MIP-PDA shell (B).

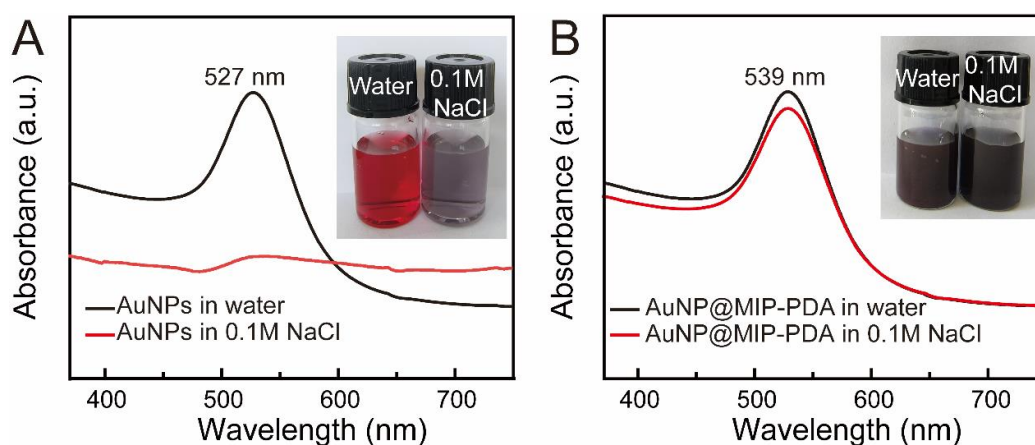

**Figure S5.** UV-vis spectra of (A) AuNPs and (B) AuNP@MIP-PDA dispersed in water and 0.1 mol/L NaCl. Insets are photographs of different dispersions.

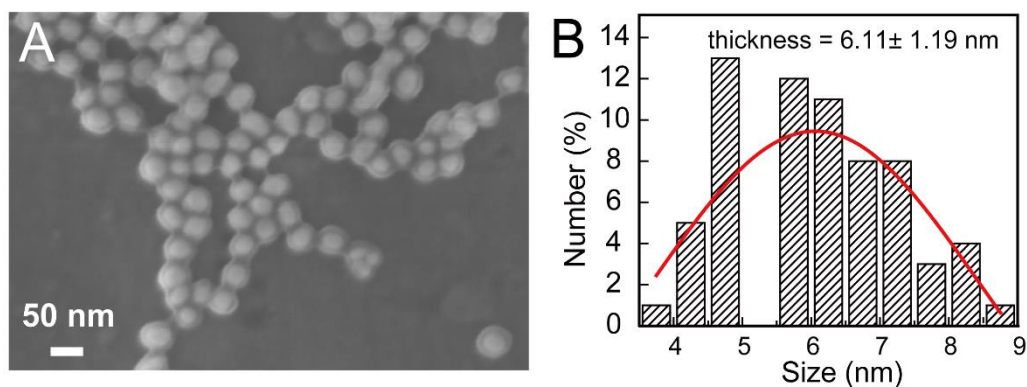

**Figure S6.** (A) SEM image of AuNP@PDA-MIP fabricated after coating AuNPs with 0.1 mg/mL DA for 40 min. (B) The size distribution of PDA-MIP shell thickness.

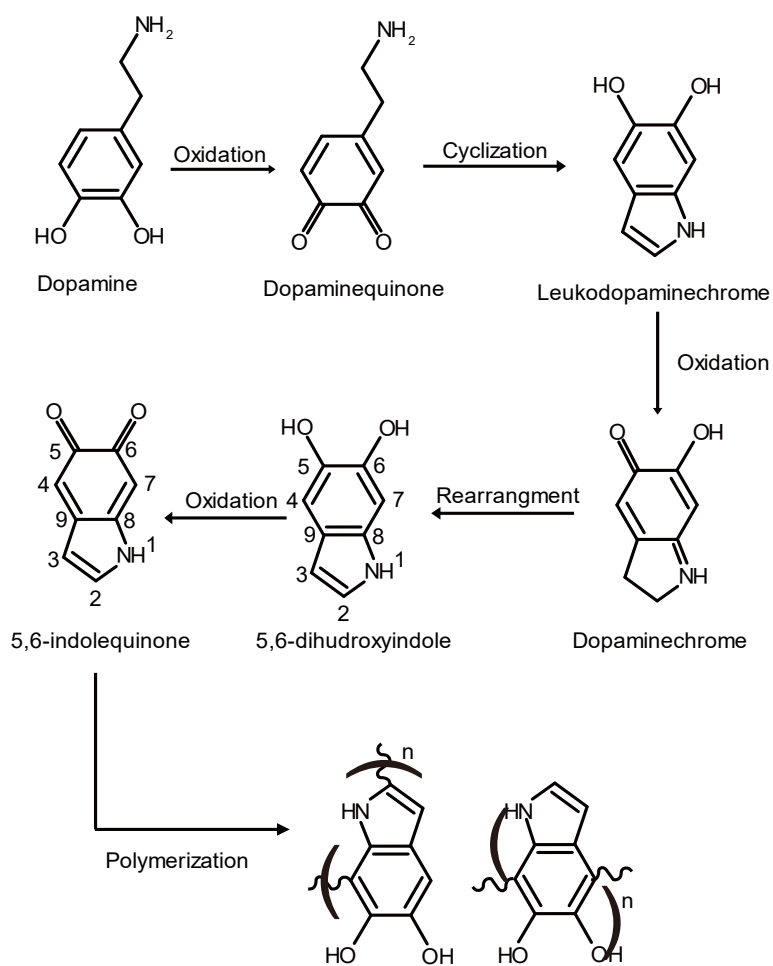

**Figure S7.** The self-polymerization process of DA in aqueous solution.

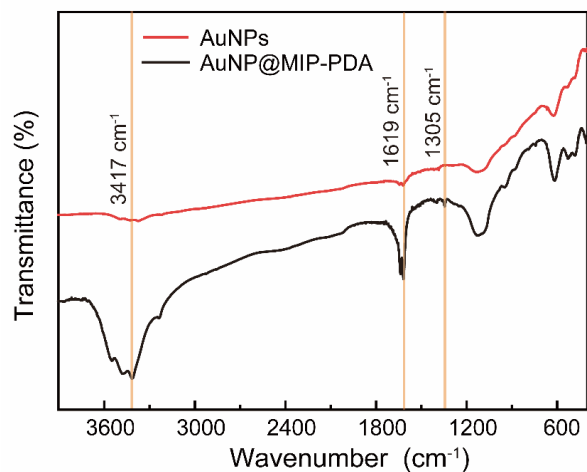

**Figure S8.** FT-IR spectra of AuNPs and AuNP@MIP-PDA.

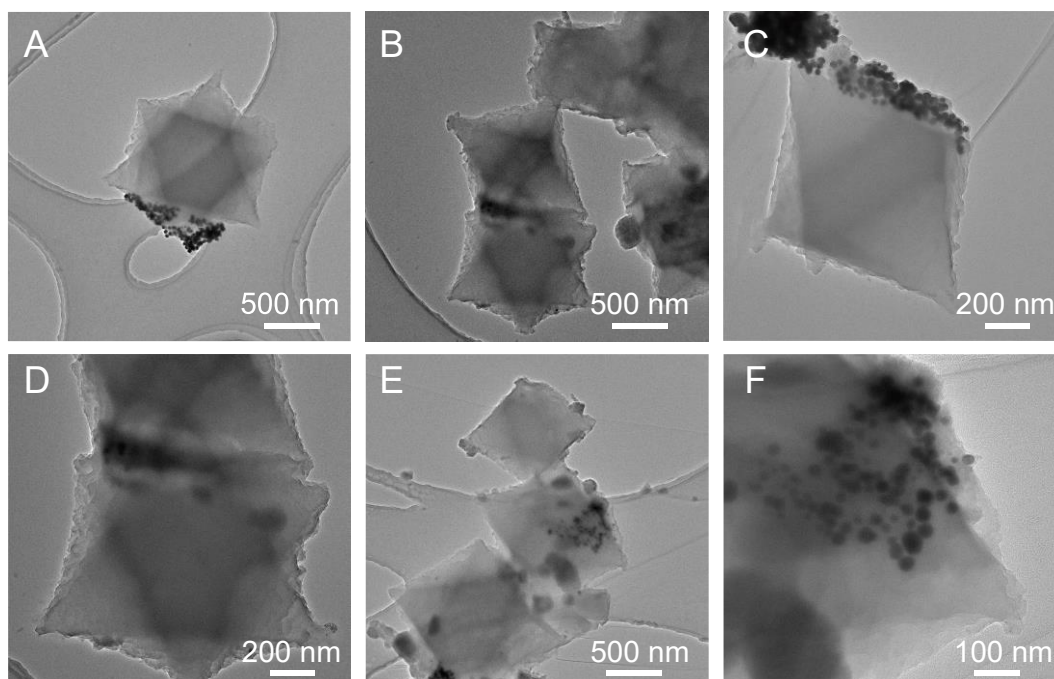

**Figure S9.** (A-F) TEM images from different views of AuNP@MIP-PDA@MIL-101(Fe) fabricated with 9 mL of AuNP@MIP-PDA in the absence of acetic acid.

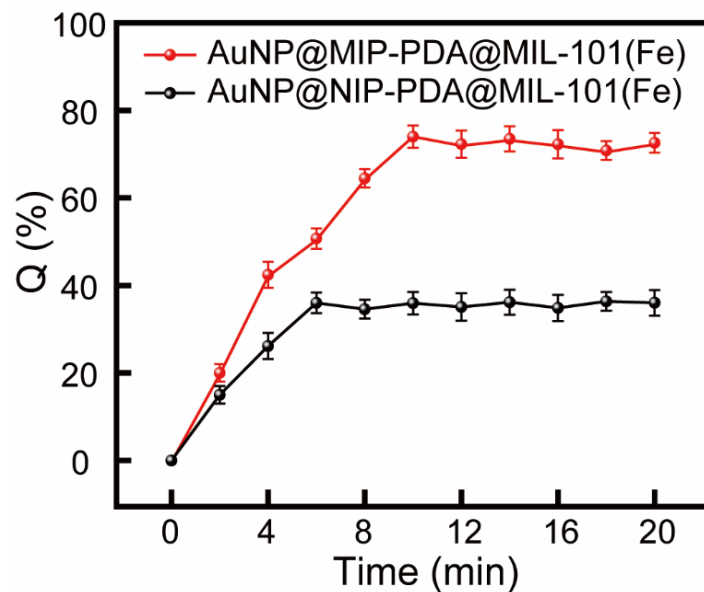

**Figure S10.** The plots of adsorption efficiency vs. time for AuNP@MIP-PDA@MIL-101(Fe) and AuNP@NIP-PDA@MIL-101(Fe) after adsorption of  $2.0 \times 10^{-8}$  mol/L 17 $\beta$ -E2, respectively. Integration time: 40 s; laser power: 40 mW.

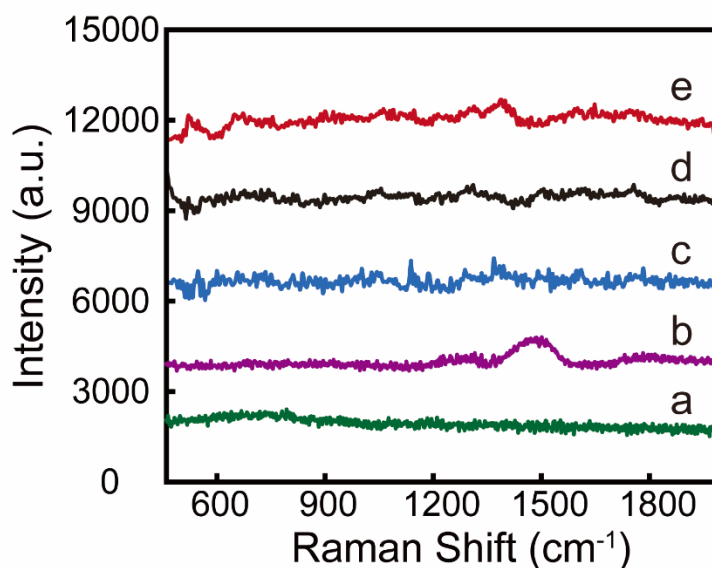

**Figure S11.** Normal Raman spectra of (a) AuNPs, (b) AuNP@MIP-PDA, (c) MIL-101(Fe), (d) AuNP@NIP-PDA@MIL-101(Fe) and (e) AuNP@MIP-PDA@MIL-101(Fe). Integration time: 40 s; laser power: 40 mW.

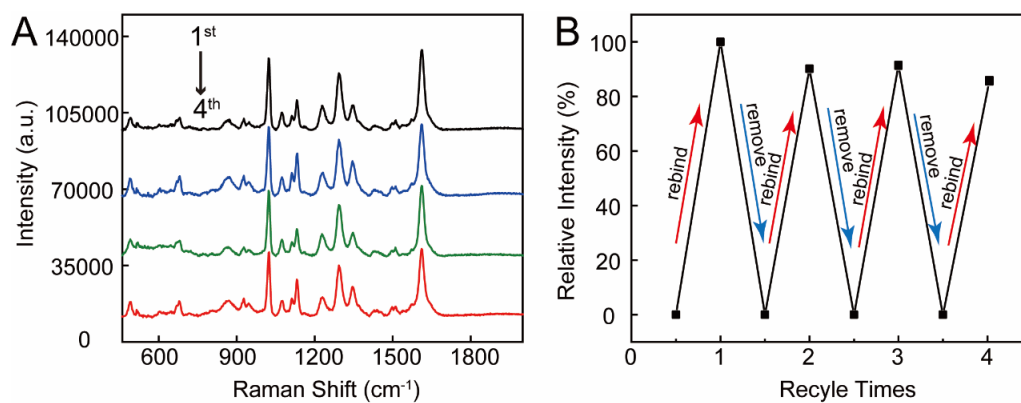

**Figure S12.** (A) SERS spectra of AuNP@MIP-PDA@MIL-101(Fe) upon four cycles of elution and recombination of  $1.0 \times 10^{-8}$  mol/L 17 $\beta$ -E2. (B) The corresponding responses by monitoring SERS intensity of the bands at 1611  $\text{cm}^{-1}$ . Integration time: 40 s; laser power: 40 mW.

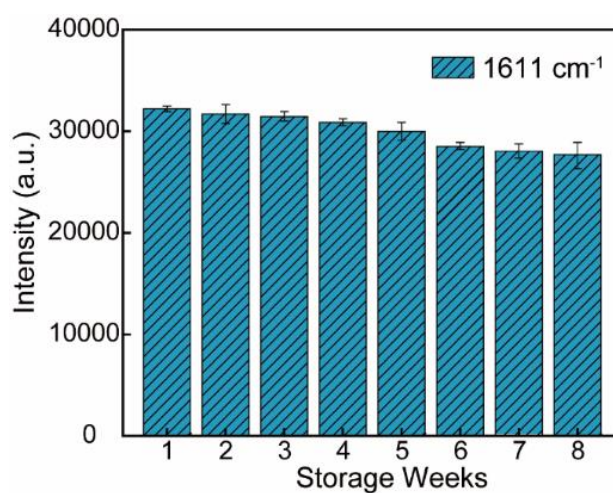

**Figure S13.** The relationships between SERS intensity at 1611  $\text{cm}^{-1}$  and the storage weeks.

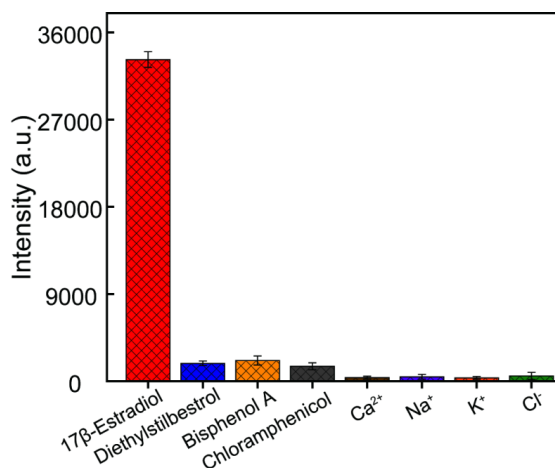

**Figure S14.** SERS band intensity of 1611 cm<sup>-1</sup> for 1.0 × 10<sup>-8</sup> mol/L 17β-E2, diethylstilbestrol, bisphenol A, chloramphenicol, Ca<sup>2+</sup>, Na<sup>+</sup>, K<sup>+</sup> and Cl<sup>-</sup>, respectively.

**Table S1.** Raman and SERS spectral data of 17β-E2 incubated on AuNP@MIP-PDA@MIL-101(Fe).<sup>1-3</sup>

| Raman | SERS | Assignments                                                     |
|-------|------|-----------------------------------------------------------------|
| -     | 868  | ν(C-C)                                                          |
| 1002  | 1024 | δ(C-C)                                                          |
| -     | 1074 | ν(C-O)                                                          |
| 1125  | 1131 | δ(C-H) ring; γ(C-H)                                             |
| 1143  | -    | δ(CH <sub>3</sub> )                                             |
| 1176  | -    | γ(CH <sub>3</sub> )                                             |
| 1233  | 1228 | γ(C-H) from methyl; δ(C-H) + δ(-OH) + ν(C-C) from phenol groups |
| 1251  | -    | ν(C-O); ν(C-C) ring                                             |
| 1300  | -    | δ(-OH)                                                          |
| 1338  | -    | ν(C-C) from phenyl rings; δ(C-H) + δ(-OH) from phenol groups    |
| 1430  | 1428 | δ(CH <sub>3</sub> )                                             |
| 1589  | -    | ν(C-C) ring                                                     |
| 1621  | 1611 | ν(C-C) ring                                                     |

v: Stretching vibration, δ: in-plane bending vibration, γ: out of plane bending vibration.



## S1. Calculation of Enhancement Factor (EF).

The EF value can be estimated using the following equation:

$$EF = \left( \frac{I_{SERS}}{I_{Raman}} \right) \times \left( \frac{N_{Raman}}{N_{SERS}} \right)$$

where  $I_{SERS}$  stands for the intensities of the vibrational mode in the SERS spectra and  $I_{Raman}$  stands for the normal Raman spectra of solid 17 $\beta$ -E2.  $N_{SERS}$  and  $N_{Raman}$  are the number of 17 $\beta$ -E2 molecules adsorbed on the AuNP@MIP-PDA@MIL-101(Fe) substrate and bulk molecules illuminated by the laser focus spot under SERS and normal Raman conditions, respectively.  $I_{SERS}$  and  $I_{Raman}$  can be obtained from the spectra directly while  $N_{SERS}$  and  $N_{Raman}$  need to be calculated on the basis of the estimation of the corresponding sample area.  $N_{SERS}$  and  $N_{Raman}$  can be obtained according to the reported method<sup>4-5</sup>.

In this work, 3  $\mu$ L of  $1.0 \times 10^{-8}$  mol/L 17 $\beta$ -E2 solution was dropped onto the AuNP@MIP-PDA@MIL-101(Fe) substrate, which left a spot of ca. 2.72 mm in diameter, following the SERS spectra of 17 $\beta$ -E2 were recorded, and the band 1611  $\text{cm}^{-1}$  was selected to calculate the EF. Suppose the molecules uniformly dispersed on the substrate and then the density of the molecules on the substrate was assumed to be  $1.0 \times 10^{-8}$  mol/L  $\times$  3  $\mu$ L  $\times$   $N_A$  / ( $\pi \times 1.36^2$   $\text{mm}^2$ ). The laser spot has a 10 $\mu$ m diameter and the surface area is about  $7.9 \times 10^{-5}$   $\text{mm}^2$ , so  $N_{SERS}$  value is estimated as following:

$$N_{SERS} = 1.0 \times 10^{-8} \text{ mol/L} \times 3 \times 10^{-6} \text{ L} \times N_A \times (7.9 \times 10^{-5} / 5.8) = 2.45 \times 10^5$$

Taking the laser spot diameter (about 10  $\mu$ m), the penetration depth (about 2  $\mu$ m), and the molecule weight of solid 17 $\beta$ -E2 (1.17  $\text{g/cm}^3$ ) into account,  $N_{Raman}$  had a value of  $4.06 \times 10^{11}$  ( $N_{Raman} = 1.17 \text{ g cm}^{-3} \times \pi \times 25 \mu\text{m}^2 \times 2 \mu\text{m} \times N_A / 272.382 \text{ g mol}^{-1} = 4.06 \times 10^{11}$ ) in the detected solid sample area.

All the spectra were normalized for laser power and acquisition time. Raman intensity  $I_{SERS}$  is 36052 cnts at the band of 1611  $\text{cm}^{-1}$ , and the  $I_{Raman}$  is measured to be 1400 cnts. Therefore,

$$EF_{17\beta\text{-E2}} = (I_{SERS} / I_{Raman}) \times (N_{Raman} / N_{SERS}) = (36052 \text{ cnts} / 1400 \text{ cnts}) \times (4.06 \times 10^{11} \text{ mol} / 2.45 \times 10^5 \text{ mol}) = 4.26 \times 10^7.$$

The EF at the band at  $1611\text{ cm}^{-1}$  of  $17\beta$ -E2 can be calculated to be  $4.26 \times 10^7$  for the AuNP@MIP-PDA@MIL-101(Fe) substrate (**Figure S15**).

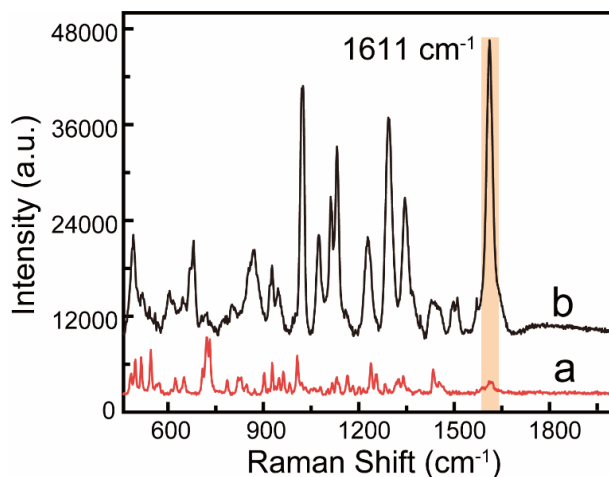

**Figure S15.** (a) Normal Raman spectrum of solid  $17\beta$ -E2; (b) SERS spectra of AuNP@MIP-PDA@MIL-101(Fe) substrate after adsorption of  $17\beta$ -E2 with the concentration of  $1.0 \times 10^{-8}$  mol/L, respectively.

#### References:

1. Wang, X.; Song, M.; Wang, Y.; Deng, W.; Li, D., Peak-differentiation-imitating-assisted SERS strategy for the accurate detection of estrogens at the femtomole level. *Chemical Communications* **2022**, *58* (100), 13887-13890.
2. Albuquerque, C. D. L.; Nogueira, R. B.; Poppi, R. J., Determination of  $17\beta$ -estradiol and noradrenaline in dog serum using surface-enhanced Raman spectroscopy and random Forest. *Microchemical Journal* **2016**, *128*, 95-101.
3. Yao, L.; Li, Y.; Cheng, K.; Pan, D.; Xu, J.; Chen, W., Determination of  $17\beta$ -estradiol by surface-enhanced Raman spectroscopy merged with hybridization chain reaction amplification on Au@Ag core-shell nanoparticles. *Mikrochim Acta* **2019**, *186* (2), 52.
4. Jiang, Z.; Gao, P.; Yang, L.; Huang, C.; Li, Y., Facile in Situ Synthesis of Silver Nanoparticles on the Surface of Metal-Organic Framework for Ultrasensitive Surface-Enhanced Raman Scattering Detection of Dopamine. *Anal Chem* **2015**, *87* (24), 12177-12182.
5. Xia, Z.; Li, D.; Deng, W., Identification and Detection of Volatile Aldehydes as Lung Cancer Biomarkers by Vapor Generation Combined with Paper-Based Thin-Film Microextraction. *Anal Chem* **2021**, *93* (11), 4924-4931.
